# Supplementary material for: A Method for Electroporation of Cre Recombinase Protein into Intact Nicotiana tabacum Cells
Source: MDPI journal article supplement (doi:10.3390/plants12081631), 2023-04-12
Supplement: s1 [file s1]

**pCambiaN-xGxFL (11902 bp)**

**Sequence annotations;** *loxP* (purple underlined), mEmerald (green), FLuc (light blue), RB (gray highlighted), LB (gray highlighted), HygR (brown), NOS promoter (indigo), 35S promoter (light indigo), transcription terminator/polyadenylation signals (black).
